# Supplementary material for: Biodiversity and Spatiotemporal Variations of Mecoptera in Thailand: Influences of Elevation and Climatic Factors
Source: MDPI journal article supplement (doi:10.3390/insects15030151), 2024-02-23
Supplement: s1 [file s1]

**Table S1.** Collection sites, biodiversity data and climatic factors of Mecoptera in Thailand.

| National park       | Site name             | Locality code | Region    | Geographic coordinate       | Elevation (m, msl) | Diversity indices |             |           |             |                |        | Climatic factors* |       |       |
|---------------------|-----------------------|---------------|-----------|-----------------------------|--------------------|-------------------|-------------|-----------|-------------|----------------|--------|-------------------|-------|-------|
|                     |                       |               |           |                             |                    | Species richness  | Individuals | Shannon_H | Simpson_1-D | Evenness_e^H/S | Chao-1 | AAP               | AMWT  | AMCT  |
| Doi Pha Hom Pok     | Mae Fang Hotspring    | 1             | North     | 19°57.961'N<br>99°9.355'E   | 569                | 3                 | 17          | 1.02      | 0.60        | 0.92           | 72     | 1357.70           | 28.63 | 18.10 |
|                     | Doi Pha Luang         | 2             | North     | 20°1.06'N<br>99°9.581'E     | 1449               | 7                 | 69          | 1.58      | 0.75        | 0.69           |        | 1356.68           | 26.17 | 15.54 |
|                     | Kiewlom               | 3             | North     | 20°3.549'N<br>99°8.553'E    | 2112               | 6                 | 41          | 1.31      | 0.66        | 0.61           |        | 1355.63           | 23.40 | 12.79 |
| Doi Inthanon        | Vachiratharn          | 4             | North     | 18°32.311'N<br>98°36.048'E  | 700                | 3                 | 12          | 0.80      | 0.44        | 0.75           | 25     | 1125.33           | 28.58 | 17.79 |
|                     | Checkpoint 2          | 5             | North     | 18°31.559'N<br>98°29.941'E  | 1639               | 5                 | 33          | 1.39      | 0.72        | 0.80           |        | 1173.82           | 25.60 | 14.75 |
|                     | Kew Mae Pan           | 6             | North     | 18°33.162'N<br>98°28.81'E   | 2200               | 3                 | 38          | 0.35      | 0.15        | 0.47           |        | 1234.43           | 22.60 | 11.85 |
|                     | Summit                | 7             | North     | 18°36.361'N<br>98°29.157'E  | 2500               | 2                 | 29          | 0.71      | 0.52        | 1.02           |        | 1235.18           | 22.35 | 11.75 |
| Doi Chiang Dao      | Pha Tang substation   | 8             | North     | 19°24.978'N<br>98°54.886'E  | 526                | 6                 | 84          | 1.39      | 0.69        | 0.67           | 19     | 1242.15           | 26.58 | 16.17 |
| Huai Nam Dang       | Headquarter           | 9             | North     | 19°18.712'N<br>98°36.399'E  | 1670               | 4                 | 30          | 0.66      | 0.30        | 0.48           | 9      | 1222.80           | 25.44 | 15.04 |
| Doi Phu Kha         | Headquarter           | 10            | North     | 19°12.562'N<br>101°4.953'E  | 1374               | 3                 | 6           | 1.03      | 0.60        | 0.94           | 5      | 1292.75           | 28.60 | 17.25 |
| Chae Son            | Waterfall             | 11            | North     | 18°50.172'N<br>99°28.38'E   | 507                | 4                 | 25          | 1.11      | 0.63        | 0.76           | 13     | 1205.45           | 29.67 | 18.71 |
|                     | Doi Lan               | 12            | North     | 18°51.815'N<br>99°22.122'E  | 1413               | 2                 | 2           | 0.94      | 1.00        | 1.28           |        | 1192.45           | 26.83 | 16.17 |
| Phu Ruea            | Rong Huay Maklaow     | 13            | Northeast | 17°29.652'N<br>101°21.02'E  | 1167               | 3                 | 30          | 0.82      | 0.52        | 0.76           | 5      | 1297.72           | 29.02 | 17.83 |
| Pa Hin Ngam         | Tung Dok Grajeaw      | 14            | Northeast | 15°38.438'N<br>101°23.576'E | 780                | 2                 | 13          | 0.66      | 0.46        | 0.96           | 3      | 1236.35           | 29.85 | 19.29 |
| Khao Yai            | Headquarter           | 15            | Northeast | 14°24.781'N<br>101°22.689'E | 770                | 5                 | 22          | 1.45      | 0.74        | 0.85           | 13     | 1248.45           | 28.00 | 18.35 |
| Nam Nao             | Checkpoint            | 16            | Central   | 16°43.687'N<br>101°33.754'E | 921                | 2                 | 61          | 0.61      | 0.42        | 0.92           | 9      | 1205.15           | 28.17 | 17.63 |
|                     | Sam Makao forest unit | 17            | Central   | 16°41.067'N<br>101°40.425'E | 528                | 3                 | 36          | 0.28      | 0.11        | 0.44           |        | 1199.23           | 29.90 | 19.35 |
| Khao Kho            | Headquarter           | 18            | Central   | 16°39.550'N<br>101°08.123'E | 230                | 2                 | 67          | 0.09      | 0.03        | 0.54           | 3      | 1321.62           | 32.33 | 21.27 |
| Thung Salaeng Luang | Gang wang Nam Yen     | 19            | Central   | 16°34.57'N<br>100°53.16'E   | 580                | 4                 | 33          | 1.04      | 0.60        | 0.70           | 9      | 1256.88           | 29.17 | 18.25 |
| Mae Wong            | Chong Yen             | 20            | Central   | 16°5.212'N<br>99°6.576'E    | 1306               | 2                 | 21          | 0.57      | 0.38        | 0.89           | 3      | 1555.53           | 27.02 | 16.17 |
| Khao Khitchakut     | Prabaht unit          | 21            | East      | 12°48.779'N<br>102°9.181'E  | 107                | 1                 | 1           | –         | –           | –              | 3      | 2502.58           | 30.75 | 22.38 |
|                     | Khao Prabaht peak     | 22            | East      | 12°50.43'N<br>102°9.83'E    | 875                | 1                 | 24          | –         | –           | –              |        | 2186.67           | 28.71 | 20.29 |

| National park        | Site name         | Locality code | Region | Geographic coordinate     | Elevation (m, msl) | Diversity indices |             |            |              |                 |        | Climatic factors* |       |       |
|----------------------|-------------------|---------------|--------|---------------------------|--------------------|-------------------|-------------|------------|--------------|-----------------|--------|-------------------|-------|-------|
|                      |                   |               |        |                           |                    | Species richness  | Individuals | Shannon _H | Simpson _1-D | Evenness _e^H/S | Chao-1 | AAP               | AMWT  | AMCT  |
| Umphang              | Mae Klong Kee     | 23            | West   | 16°13'30.8"N 98°58'47.1"E | 1231               | 3                 | 3           | 1.43       | 1.00         | 1.40            | 33     | 1617.20           | 26.90 | 15.96 |
|                      | Thi Lor Su        | 24            | West   | 15°55'14.5"N 98°45'53.0"E | 567                | 7                 | 35          | 1.52       | 0.68         | 0.65            |        | 1961.45           | 29.13 | 18.23 |
| Khuean Srinagarindra | Tham Nanya        | 25            | West   | 14°41.604'N 98°53.035'E   | 750                | 1                 | 3           | –          | –            | –               | 1      | 1968.45           | 29.42 | 18.71 |
| Kaeng Krachan        | Panern Thung      | 26            | West   | 12°47.831'N 99°27.369'E   | 790                | 2                 | 26          | 0.29       | 0.15         | 0.67            | 3      | 1063.95           | 28.96 | 20.96 |
|                      | Pa La-U waterfall | 27            | West   | 12°32.154'N 99°28.098'E   | 320                | 2                 | 21          | 0.22       | 0.10         | 0.62            |        | 1131.83           | 29.13 | 21.46 |
| Namtok Yong          | Protection unit3  | 28            | South  | 8°13.434'N 99°48.295'E    | 372                | 3                 | 7           | 1.22       | 0.76         | 1.13            | 5      | 2045.58           | 29.67 | 21.31 |
|                      | TV aerial         | 29            | South  | 8°14.262'N 99°48.289'E    | 952                | 1                 | 8           | –          | –            | –               |        | 2045.58           | 29.67 | 21.31 |

Abbreviations: \* AAP, Average Annual Precipitation; AMWT, Average Monthly Warmest Temperature; AMCT, Average Monthly Coolest Temperature.
